# Supplementary material for: Copper supported on MWCNT-guanidine acetic acid@Fe3O4: synthesis, characterization and application as a novel multi-task nanocatalyst for preparation of triazoles and bis(indolyl)methanes in water
Source: Royal Society of Chemistry journal article supplement (doi:10.1039/c5ra23294e), 2016-01-01

## Supporting Information

### Copper Supported on MWCNT-Guanidine Acetic Acid@Fe<sub>3</sub>O<sub>4</sub>: Synthesis, Characterization and Application as a Novel Multi-Task Nanocatalyst for Preparation of Triazoles and Bis(indolyl)methanes in Water

Ahmad Shaabani,\* Ronak Afshari, Seyyed Emad Hooshmand, Azadeh Tavousi Tabatabaei and  
Fateme Hajishaabanha

Faculty of Chemistry, Shahid Beheshti University, G. C., P. O. Box 19396-4716, Tehran, Iran

Email: [a-shaabani@sbu.ac.ir](mailto:a-shaabani@sbu.ac.ir)

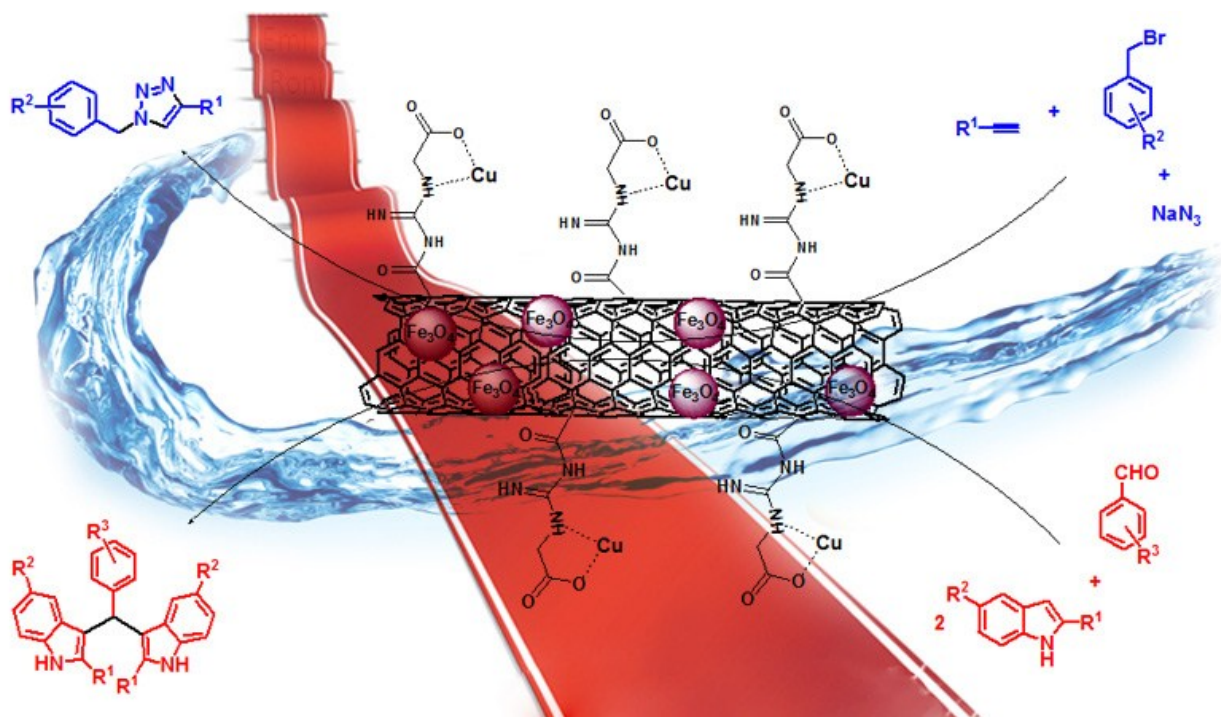

## Table of contents

1. Experimental Section
2. Materials and Instrumentation
3. Magnetically separable catalyst
4. Analytical data of compounds
5.  $^1\text{H}$ ,  $^{13}\text{C}$  NMR for the new compounds

## Experimental Section

### Preparation of catalyst

### Preparation of MWCNT-COCl

The carboxylic acid group of MWCNT-COOH was converted to formyl chloride *via* reaction with thionyl chloride. In a round bottom flask, excess amount of  $\text{SOCl}_2$  (30 ml) was added to MWCNT-COOH (0.100 g). The suspension was refluxed for 48 h at 75 °C. Thereafter, the sample was evaporated under reduced pressure, followed by a complete removal of unreacted  $\text{SOCl}_2$  on a rotary evaporator with a vacuum pump. The remaining solid (MWCNT-COCl) was washed out three times with anhydrous tetrahydrofuran (THF) and dried in an oven at 60 °C for 5 h.

### Preparation of MWCNT-GAA

In a typical procedure, 0.080 g MWCNT-COCl was dispersed in 25 ml DMF and sonicated for 30 min then mixed with 0.060 g (0.001 mol) GAA. The mixture was stirred for 5 h under  $\text{N}_2$  atmosphere at room temperature. Then the solvent was evaporated, remaining solid washed with acetone and the precipitate dried in vacuum at 60 °C to afford MWCNT-GAA.

### Preparation of Cu/MWCNT-GAA

MWCNT-GAA (0.500 g) was dispersed in water,  $\text{CuCl}_2 \cdot 2\text{H}_2\text{O}$  (0.043 g, 0.00025 mmol) which was dissolved in 5 ml water added dropwise, then ascorbic acid (50 mL, 0.025M) was added, temperature of mixture was increased to 80 °C and stirring continued at 80 °C for 24h. The solvent was evaporated, and the remaining solid was washed three times with deionized water and ethanol. Finally the precipitate was dried in vacuum at 60 °C overnight to give Cu/MWCNT-GAA.

### In situ preparation of Cu/MWCNT-GAA@ $\text{Fe}_3\text{O}_4$

The next step in the accomplishment of catalyst preparation was synthesis of the magnetic Fe<sub>3</sub>O<sub>4</sub> using co-precipitation technique.<sup>44</sup> The Fe<sub>3</sub>O<sub>4</sub> NPs (1.000 g) was dispersed in water (15 mL) and sonicated for 15 min then MWCNT-GAA (1.000 g) added and sonication continued for 2 h at room temperature. In addition, a solution of CuCl<sub>2</sub>.2H<sub>2</sub>O (0.043 g, 0.00025 mmol) in 5 mL water was added dropwise to the reaction mixture, followed by addition of ascorbic acid (50 mL, 0.025M). The reaction mixture was stirred on magnetic heater stirrer at 80 °C for 24h. Finally, by applying an external magnet, Cu/MWCNT-GAA@Fe<sub>3</sub>O<sub>4</sub> nanoparticles were collected and washed three time with deionized water/ethanol and the magnetic precipitate was dried in vacuum at 60 °C.

### **General procedure for the synthesis of 1,2,3-triazoles**

Alkynes (1 mmol), benzyl bromide derivatives (1 mmol) and sodium azide (1 mmol, 0.065 g) were added to a 10 ml round bottom flask fitted with a magnetic stirrer containing a suspension of catalyst (0.400 mol%, 0.020 g) in water (5 mL). The resultant mixture was heated at 50 °C. The progress of the reaction was followed by thin layer chromatography (TLC) (ethyl acetate/n-hexane). Upon completion, the mixture cooled to room temperature and the catalyst separated using an external magnet and the product was extracted with chloroform. The solvent was removed in vacuum to afford the pure product. If necessary the purification was performed by recrystallization from ethyl acetate or ethanol.

### **General procedure for the synthesis of bis(indolyl)methanes**

In a 10 mL round bottom flask equipped with magnetic stir bar an indole (1 mmol), an aldehyde (0.5 mmol) and water (5 mL) were added. The catalyst (0.200 mol%, 0.01 g) was added and the mixture was stirred at 70 °C for 40-80 min. Progress of reaction was monitored by TLC (ethyl acetate/n-hexane). Then chloroform (2 × 5 mL) was added to the reaction mixture and the catalyst was separated using an external magnet. The chloroform layer was separated, evaporated under reduced pressure to give the crude product which was purified via recrystallization in ethanol–water mixture.

## **Materials and Instrumentation**

The materials were purchased from Merck and Aldrich and used without further purification. Carboxyl multi wall carbon nanotubes (purity > 95 %, -COOH content: 2.00 wt%, outer diameter: 10-20 nm, inner diameter: 5-10 nm, length: 30µm, special surface area: 220 m<sup>2</sup> /g) was purchased from Atoor Sanat Abtin, Tehran, Iran. Products were analyzed using a Varian 3900 GC. X-ray diffraction (XRD) pattern of catalyst was recorded on a STOE STADI P with scintillation detector, secondary monochromator using Cu K $\alpha$  radiation ( $\lambda = 0.1540$  nm). Copper(II) determination was carried out on an FAAS (Shimadzu model AA-680 flame atomic absorption spectrometer) with a Cu hollow cathode lamp at 324.7 nm, using an air-acetylene flame. Transmission Electron Microscopy (TEM) was performed using a transmission microscope Philips CM-30 with an accelerating voltage of 150 Kv. Scanning electron microscopy (SEM) observations were carried out on an electron microscopy Philips XL-30 ESEM. Thermogravimetric analysis (TGA) was carried out using STA 1500 instrument at a heating rate of 10 °C min<sup>-1</sup> in air. Melting points were measured on an Electrothermal 9100 apparatus and are uncorrected. IR spectra were recorded on a Shimadzu IR-470 spectrometer. The elemental analyses were performed with an Elementar Analysensysteme GmbH VarioEL.<sup>1</sup>H and <sup>13</sup>C NMR spectra were recorded on a BRUKER DRX-300 AVANCE spectrometer at 300.13 and 75.47 MHz. NMR spectra were obtained in DMSO-d<sub>6</sub> and CDCl<sub>3</sub>.

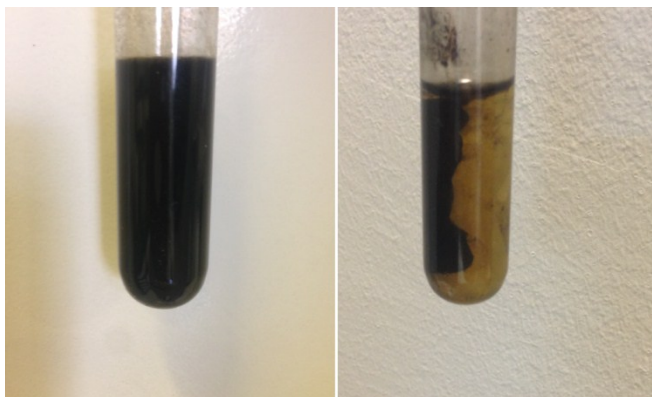

Magnetically separable catalyst

## Analytical data of compounds

### Spectral data for new derivatives of 1,2,3-triazoles

**1-(4-Nitrobenzyl)-4-(4-(trifluoromethyl)phenyl)-1H-1,2,3-triazole** (Table 1, Entry 6). White powder; m.p.: 215-218 °C; <sup>1</sup>H NMR (300 MHz, CDCl<sub>3</sub>) δ (ppm) 5.74 (2H, s), 7.47-7.50 (2H, m), 7.68-7.71 (2H, m), 7.84 (1H, s), 7.94-7.96 (2H, m), 8.26-8.29 (2H, m); <sup>13</sup>C NMR (75 MHz, CDCl<sub>3</sub>) δ (ppm) 53.1, 118.1, 120.0, 120.5, 121.8, 124.9, 125.2, 127.7, 132.5, 140.1, 147.2.

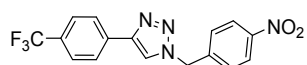

**1-(3-Iodobenzyl)-4-p-tolyl-1H-1,2,3-triazole** (Table 1, Entry 7). white powder; m.p. 178-181 °C; <sup>1</sup>H NMR (300 MHz, CDCl<sub>3</sub>) δ (ppm) 2.38 (3H, s), 5.51 (2H, s), 7.09-7.14 (1H, m), 7.22-7.27 (3H, m), 7.62-7.72 (5H, m); <sup>13</sup>C NMR (75 MHz, CDCl<sub>3</sub>) δ (ppm) 21.3, 53.2, 94.7, 118.85, 119.25, 119.58, 125.63, 127.51, 129.50, 129.63, 130.77, 136.80, 136.97, 137.86, 138.16, 148.49, 158.53.

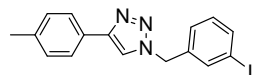

### Spectral data for new derivative of bis(indolyl)methane

**3-((1H-Indol-3-yl)(2-(prop-2-ynyloxy)phenyl)methyl)-1H-indole** (Table 2, Entry 5). Dark red powder; m.p. 177-178 °C; <sup>1</sup>H NMR (300 MHz, DMSO-*d*<sub>6</sub>) δ (ppm) 3.58 (1H, s), 4.87 (2H, s), 6.23 (1H, s), 6.76-6.86 (4H, m), 7.13-7.36 (10H, m), 10.79 (2H, brs); <sup>13</sup>C NMR (75 MHz, DMSO-*d*<sub>6</sub>) δ (ppm) 31.9, 56.2, 78.5, 80.1, 111.8, 113.8, 118.0, 118.5, 119.4, 121.3, 123.9, 124.0, 127.1, 127.2, 129.8, 133.7, 136.8, 137.0, 154.6; Anal. Calcd. (%) for C<sub>26</sub>H<sub>20</sub>N<sub>2</sub>O: C, 82.95; H, 5.35; N, 7.44. Found: C, 82.90; H, 5.42; N, 7.21.

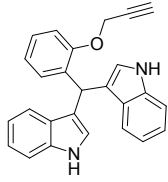

<sup>1</sup>H, <sup>13</sup>C NMR for the new compounds

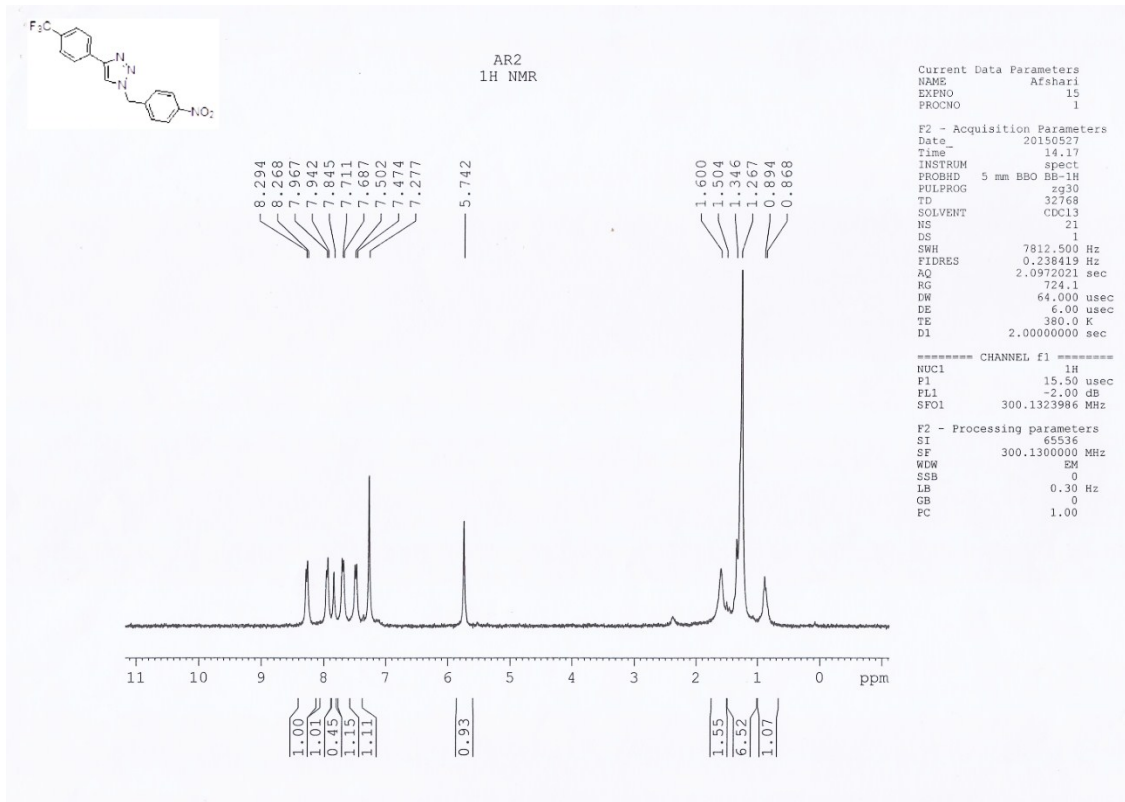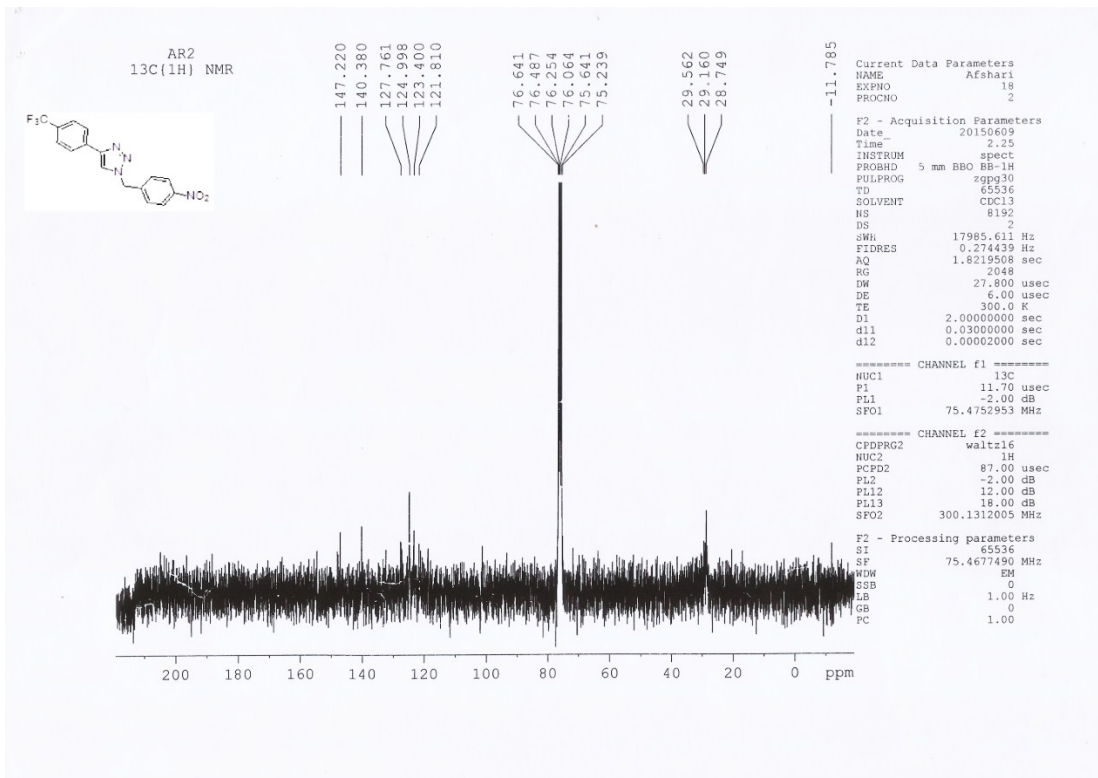

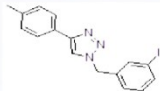

AR1  
1H NMR

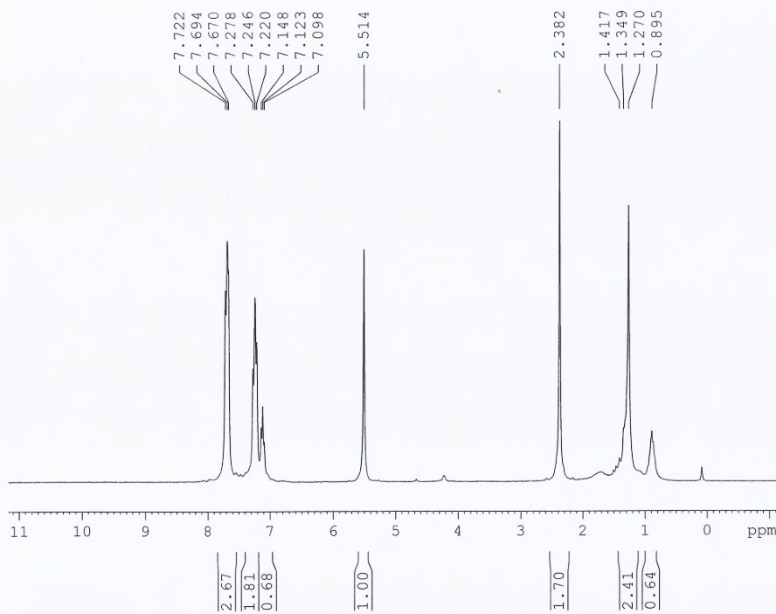

Current Data Parameters  
 NAME Afshari  
 EXPNO 14  
 PROCNO 1

F2 - Acquisition Parameters  
 Date 20150527  
 Time 14.14  
 INSTRUM spect  
 PROBHD 5 mm BBO BB-1H  
 PULPROG zg30  
 TD 32768  
 SOLVENT CDCl3  
 NS 16  
 DS 1  
 SWH 7812.500 Hz  
 FIDRES 0.238419 Hz  
 AQ 2.0972021 sec  
 RG 724.1  
 DW 64.000 usec  
 DE 6.00 usec  
 TE 380.0 K  
 D1 2.00000000 sec

----- CHANNEL f1 -----  
 NUC1 1H  
 P1 15.50 usec  
 PL1 -2.00 dB  
 SFO1 300.1323986 MHz

F2 - Processing parameters  
 SI 65536  
 SF 300.1300000 MHz  
 WDM EM  
 SSB 0  
 LB 0.30 Hz  
 GB 0  
 PC 1.00

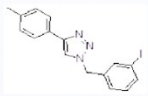

AR2  
13C{1H} NMR

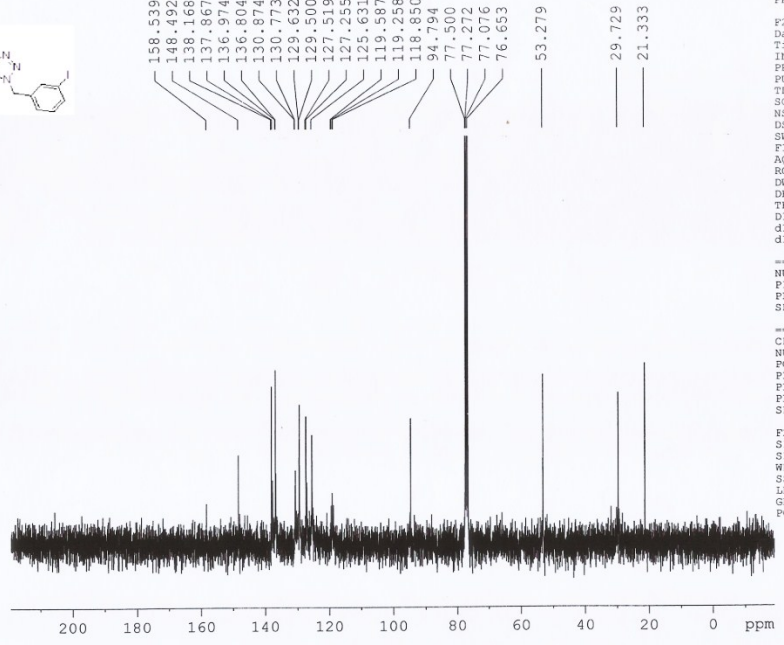

Current Data Parameters  
 NAME Afshari  
 EXPNO 17  
 PROCNO 1

F2 - Acquisition Parameters  
 Date 20150531  
 Time 10.35  
 INSTRUM spect  
 PROBHD 5 mm BBO BB-1H  
 PULPROG zgpg30  
 TD 65536  
 SOLVENT CDCl3  
 NS 250  
 DS 2  
 SWH 17985.611 Hz  
 FIDRES 0.274439 Hz  
 AQ 1.6219508 sec  
 RG 2048  
 DW 27.800 usec  
 DE 6.00 usec  
 TE 300.0 K  
 D1 2.00000000 sec  
 d11 0.03000000 sec  
 d12 0.00000000 sec

----- CHANNEL f1 -----  
 NUC1 13C  
 P1 11.70 usec  
 PL1 -2.00 dB  
 SFO1 75.4752953 MHz

----- CHANNEL f2 -----  
 CDFPRG2 waltz16  
 NUC2 1H  
 FCPD2 87.00 usec  
 PL2 -2.00 dB  
 PL12 12.00 dB  
 PL13 18.00 dB  
 SFO2 300.1312005 MHz

F2 - Processing parameters  
 SI 65536  
 SF 75.4677490 MHz  
 WDM EM  
 SSB 0  
 LB 1.00 Hz  
 GB 0  
 PC 1.00



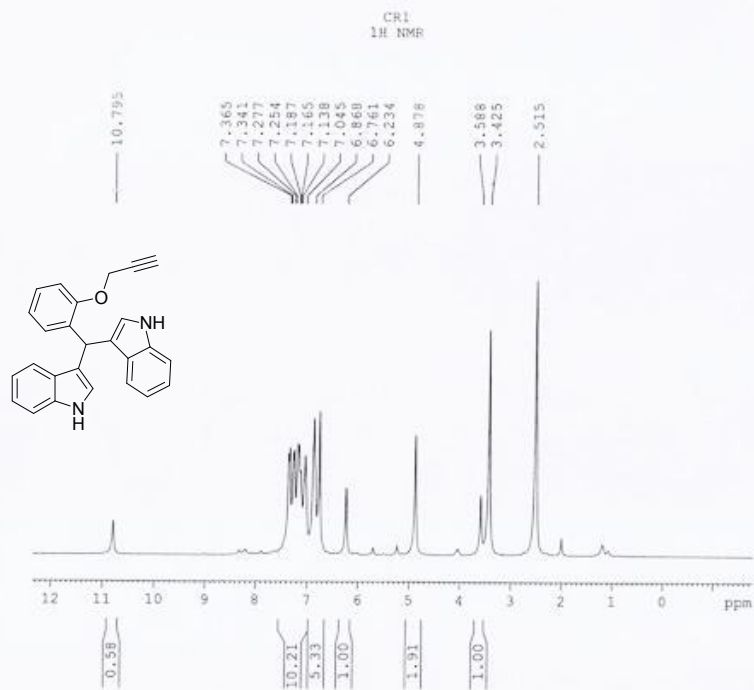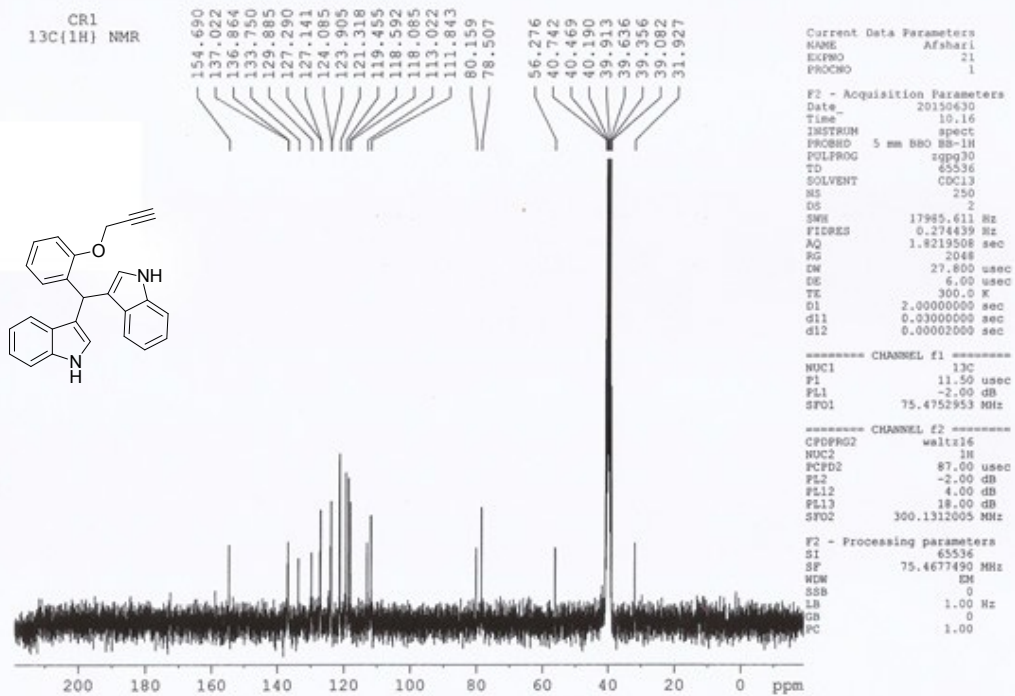

Supplement: c5ra23294e1.pdf [file c5ra23294e1.pdf]
